# Supplementary material
Source: MDPI journal article supplement (https://www.mdpi.com/2227-9040/11/9/484)
Supplement: s1 [file s1]

## *Supplementary Materials*

*For*

# **Colorimetric Detection and Killing of Bacteria by Enzyme-Instructed Self-Aggregation of Peptide-Modified Gold Nanoparticles**

**Dan Yin <sup>1</sup>, Xiao Li <sup>1</sup>, Xin Wang <sup>2,\*</sup>, Jin-Zhou Liu <sup>1</sup>, Wen-Zhi She <sup>1</sup>, Jiahui Liu <sup>3,\*</sup>, Jian Ling <sup>1</sup>, Rong Sheng Li <sup>1,\*</sup> and Qiue Cao <sup>1</sup>**

<sup>1</sup> National Demonstration Center for Experimental Chemistry and Chemical Engineering Education (Yunnan University), School of Chemical Science and Engineering, Yunnan University, Kunming 650091, China;

yindan@stu.ynu.edu.cn (D.Y.); lixiao\_rwk0@stu.ynu.edu.cn (X.L.); 12021116015@mail.ynu.edu.cn (J.-Z.L.); swzhi21@mail.ynu.edu.cn (W.-Z.S.); lingjian@ynu.edu.cn (J.L.); qecao@ynu.edu.cn (Q.C.)

<sup>2</sup> Department of Orthopaedics, The Third Affiliated Hospital, Yunnan University of Chinese Medicine, Kunming 650051, China

<sup>3</sup> Institute of Biomedical Engineering, Kunming Medical University, Kunming 650500, China

\* Correspondence: wangxin@ynutcm.edu.cn (X.W.); liujiahui@kmmu.edu.cn (J.L.); lirong.sheng@ynu.edu.cn (R.S.L.)

**Table S1.** High performance liquid chromatography (HPLC) peaks of CF<sub>4</sub>KYP.

| Peak | Time   | Height     | Area        | Conc.   |
|------|--------|------------|-------------|---------|
| 1    | 7.433  | 1498.536   | 15566.402   | 0.2921  |
| 2    | 8.840  | 1201.502   | 22311.703   | 0.4187  |
| 3    | 9.638  | 8790.235   | 89428.344   | 1.6783  |
| 4    | 9.832  | 305713.250 | 4919143.000 | 92.3199 |
| 5    | 10.188 | 25168.014  | 171152.031  | 3.2121  |
| 6    | 10.479 | 6480.615   | 45130.223   | 0.8470  |
| 7    | 10.872 | 3519.667   | 53393.016   | 1.0021  |
| 8    | 11.752 | 1166.092   | 12243.196   | 0.2298  |

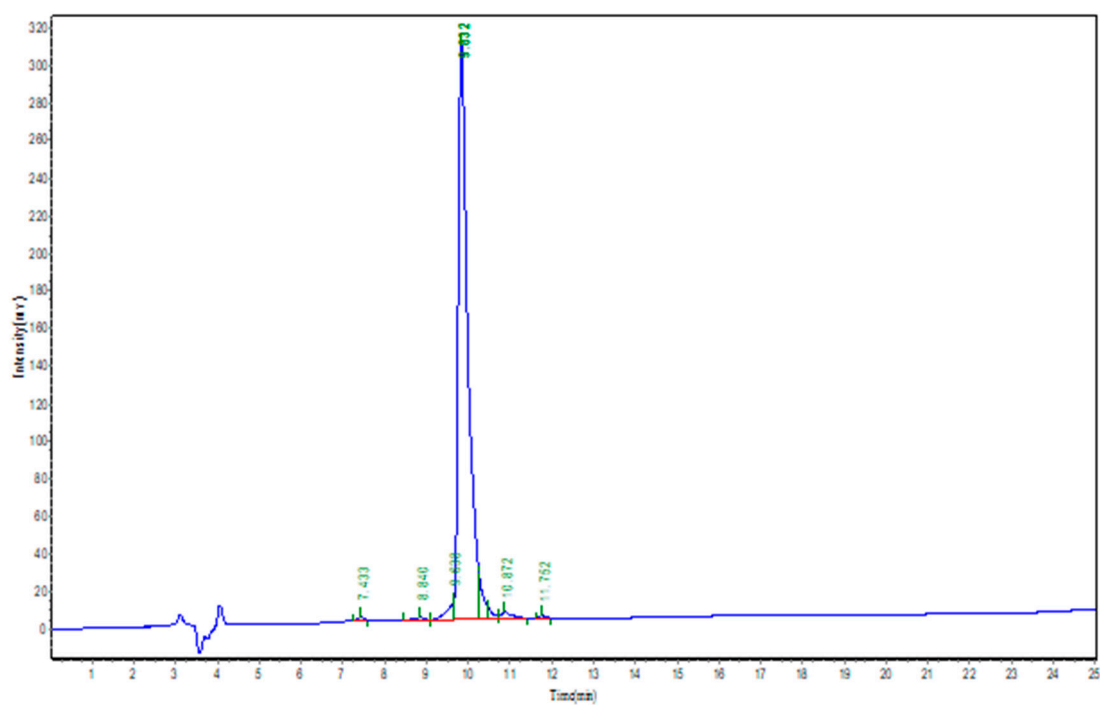

**Figure S1.** HPLC spectra of CF<sub>4</sub>KYP.

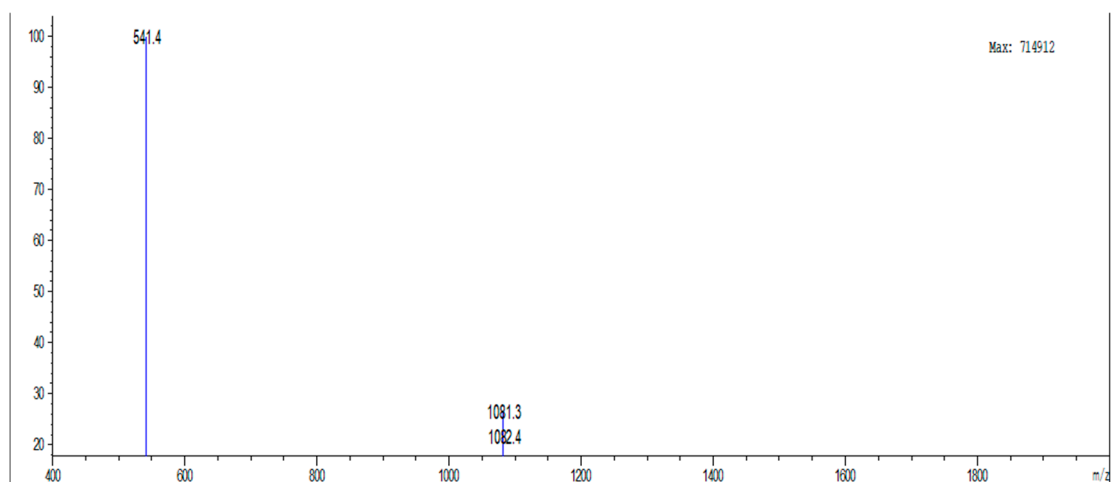

Figure S2. Mass spectra of  $\text{CF}_4\text{KY}^{\text{P}}$  (MW= 1081.17)

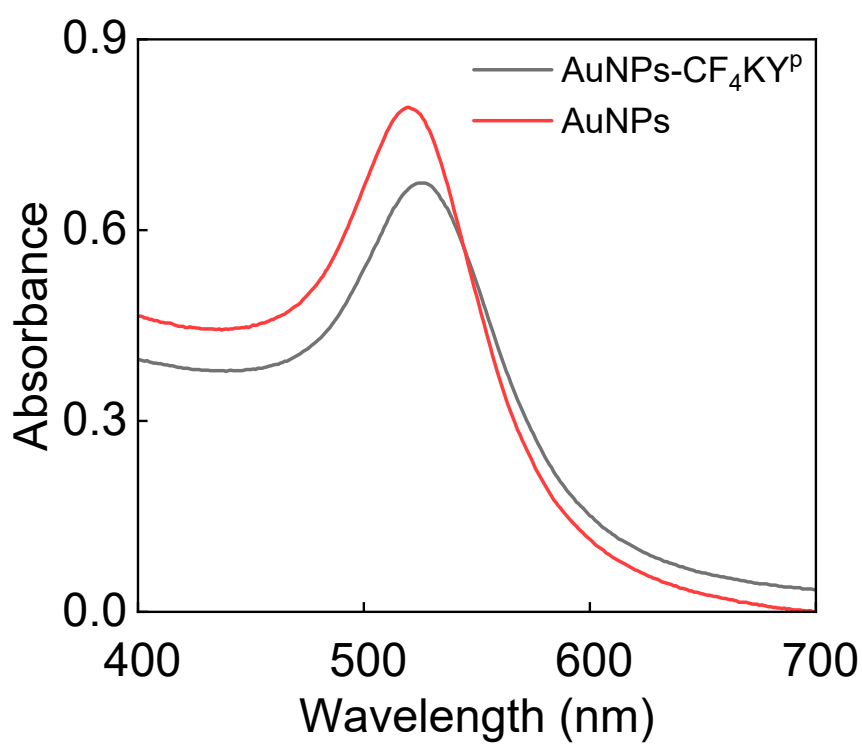

Figure S3. UV-vis spectra of AuNPs and AuNPs- $\text{CF}_4\text{KY}^{\text{P}}$ .

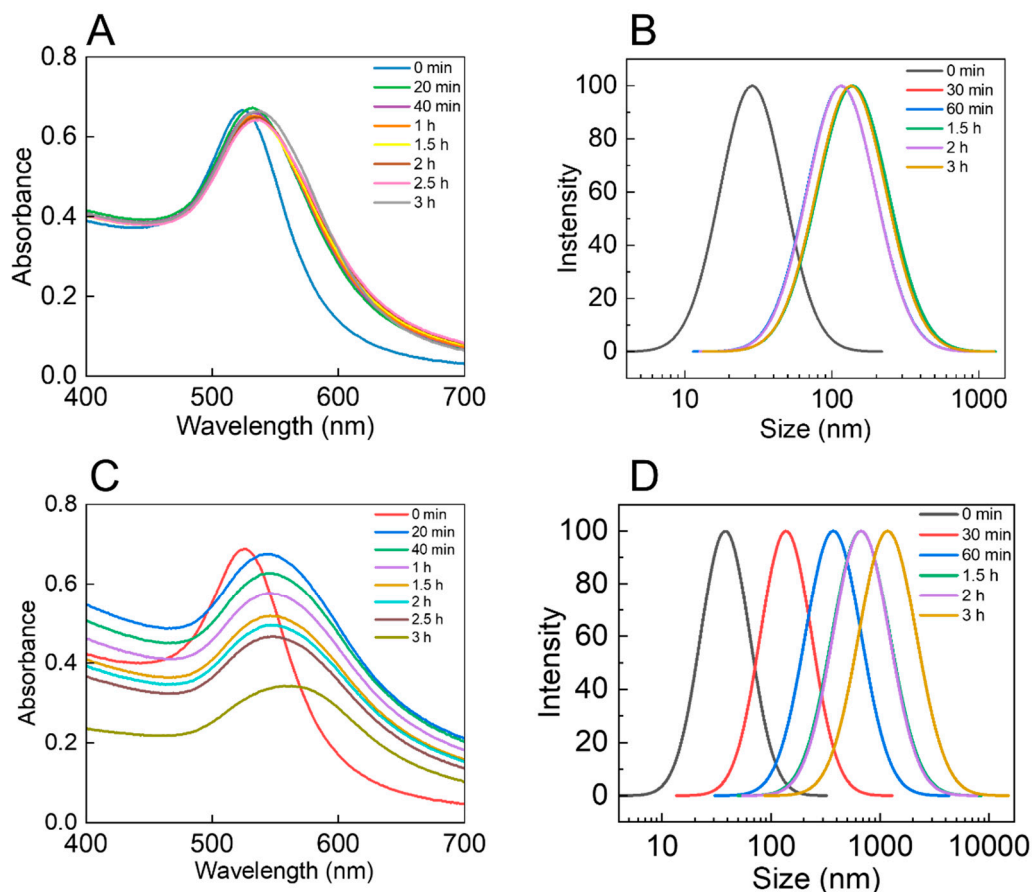

**Figure S4.** (A) UV-vis spectra and (B) hydrodynamic size profiles of AuNPs-CF<sub>4</sub>KY<sup>P</sup>-1 before and after the addition of ALP. (C) UV-vis spectra and (D) hydrodynamic size profiles of AuNPs-CF<sub>4</sub>KY<sup>P</sup>-2 before and after the addition of ALP. Experiments were repeated three times.

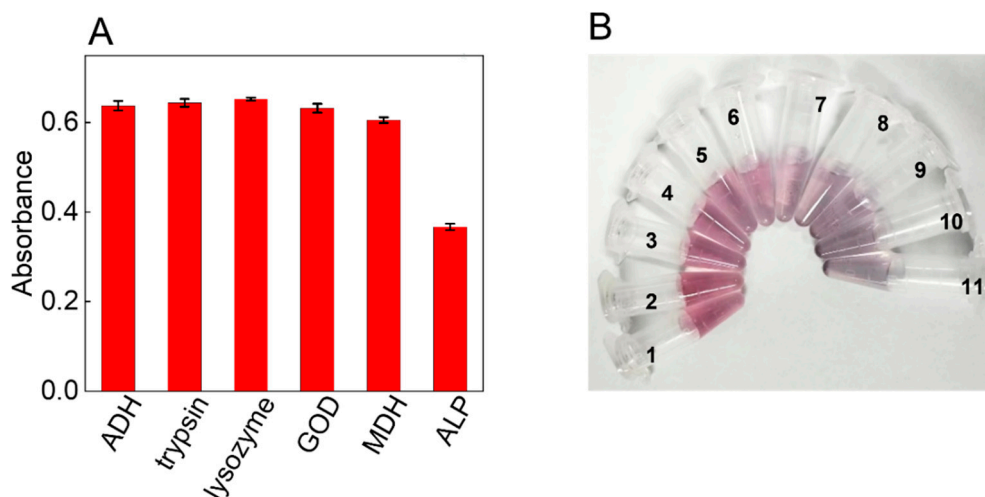

**Figure S5.** (A) The absorbance changes (530 nm) of the AuNPs-CF<sub>4</sub>KY<sup>P</sup> after incubating with different enzymes. Data are presented as mean  $\pm$  S.D. Error bars were obtained from three replicate experiments. (B) The picture of AuNPs-CF<sub>4</sub>KY<sup>P</sup> solutions at different concentrations of ALP. 1, 2 U·mL<sup>-1</sup>; 2, 2.2 U·mL<sup>-1</sup>; 3, 2.4 U·mL<sup>-1</sup>; 4, 2.6 U·mL<sup>-1</sup>; 5, 2.8 U·mL<sup>-1</sup>; 6, 3.0 U·mL<sup>-1</sup>; 7, 3.2 U·mL<sup>-1</sup>; 8, 3.4 U·mL<sup>-1</sup>; 9, 3.6 U·mL<sup>-1</sup>; 10, 3.8 U·mL<sup>-1</sup>; 11, 4 U·mL<sup>-1</sup>). Experiments were repeated three times.

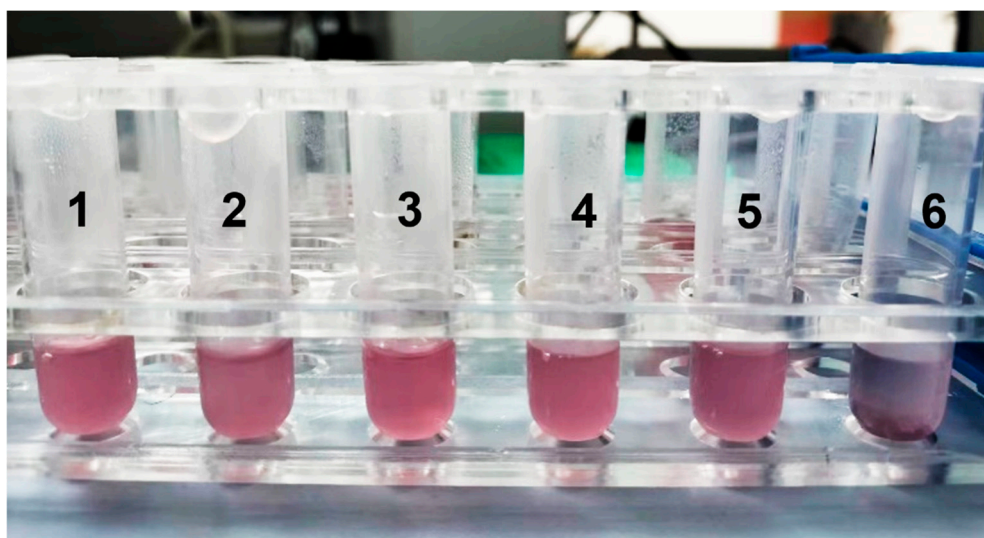

**Figure S6.** The picture of AuNPs- CF<sub>4</sub>KY<sup>p</sup> solutions after incubating with different bacteria. 1, *E. coli*; 2, *K. pneumoniae*; 3, *A. baumannii*; 4, *S. aureus*; 5, *DH-5α*; 6, *S. typhimurium*. Experiments were repeated three times.

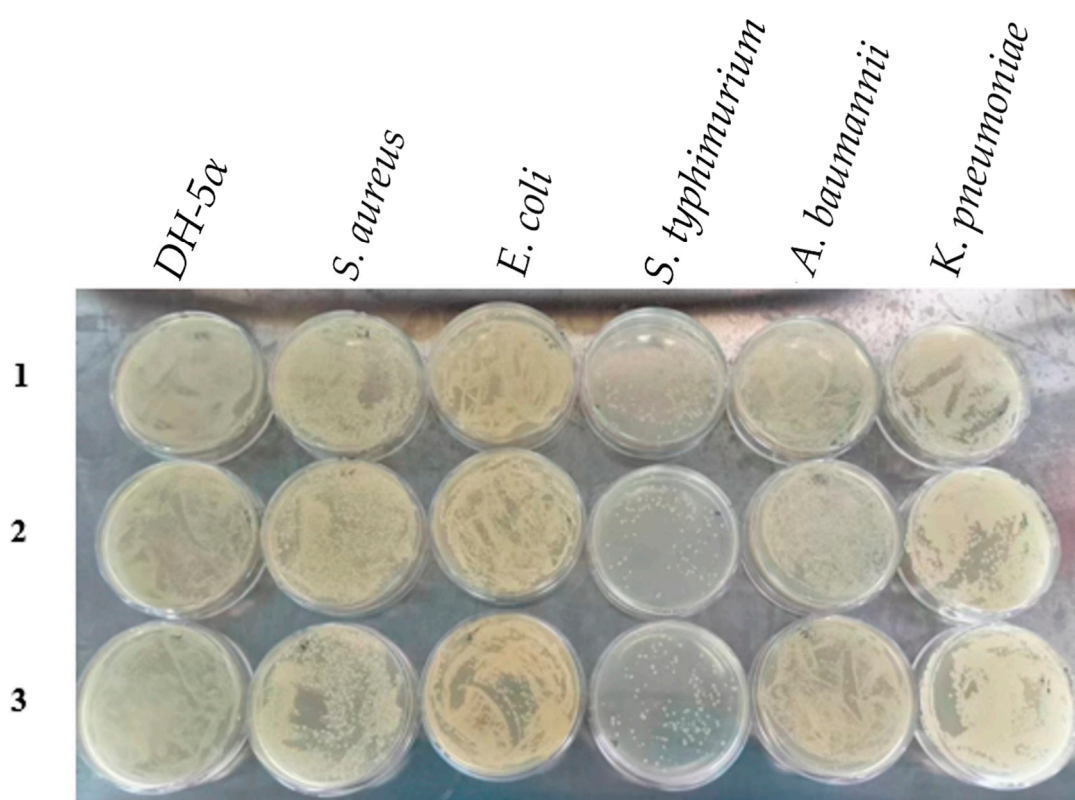

**Figure S7.** Colony growth image of different bacteria after incubating with AuNPs- CF<sub>4</sub>KY<sup>p</sup>.

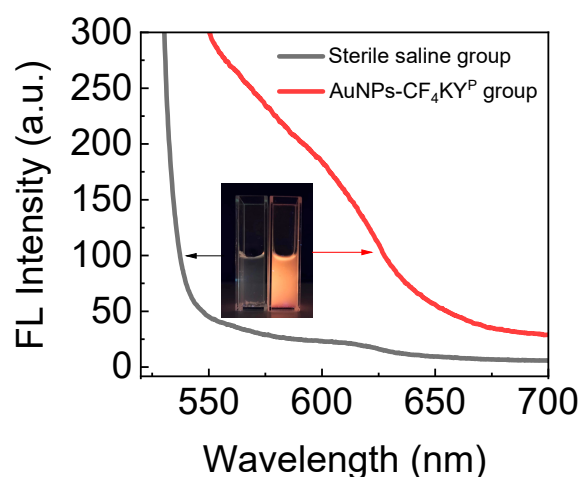

**Figure S8.** ROS fluorescence spectra of *S. typhimurium* after incubating with AuNPs-CF<sub>4</sub>KY<sup>P</sup> or sterile saline. The inset fluorescence image is the *S. typhimurium* solutions after incubating with a commercial bacteria ROS kit (BBoxiProbeO13).

**Table S2.** Typical research work on colorimetric detection of bacteria in the past five years.

| Detection of bacteria               | Detection limit<br>(CFU·mL <sup>-1</sup> ) | Antimicrobial<br>performance | References |
|-------------------------------------|--------------------------------------------|------------------------------|------------|
| <i>Salmonella typhimurium</i>       | 7                                          | 80%                          | This work  |
| <i>Salmonella typhimurium</i>       | 61                                         | —                            | [1]        |
| <i>Escherichia coli</i>             | 24                                         | —                            | [2]        |
| <i>Bacillus subtilis</i>            | 2                                          | —                            | [2]        |
| <i>E. coli</i> ATCC 25922           | 10                                         | 80%-90%                      | [3]        |
| <i>S.aureus</i> ATCC 25323          | 10                                         | 80%-90%                      | [3]        |
| <i>Escherichia coli</i>             | $3.38 \times 10^6$                         | 90%                          | [4]        |
| <i>Salmonella typhimurium</i>       | 2.65                                       | —                            | [5]        |
| MRSA                                | 1                                          | —                            | [6]        |
| <i>E. coli</i> WT3110               | $10^2$                                     | —                            | [7]        |
| <i>S. aureus</i> ATCC 25923         | $10^2$                                     | —                            | [7]        |
| <i>S. aureus</i> and <i>E. coli</i> | —                                          | >90%                         | [8]        |
| <i>Escherichia coli</i> O157:H7     | 4.1                                        | —                            | [9]        |
| <i>Escherichia coli</i> O157:H7     | 10                                         | —                            | [10]       |
| <i>Escherichia coli</i> ATCC25922   | $1.02 \times 10^3$                         | —                            | [11]       |
| gram-positive bacterium             | $10^2$                                     | —                            | [12]       |
| gram-negative bacterium             | $10^2$                                     | —                            | [12]       |
| <i>Escherichia coli</i> ATCC 8739   | 100/44                                     | —                            | [13]       |
| <i>Salmonella typhimurium</i>       | 1                                          | —                            | [14]       |
| <i>Streptococcus pneumoniae</i>     | 65                                         | —                            | [15]       |
| <i>S. aureus</i> (ATCC 29213)       | 80                                         | —                            | [16]       |

|                                   |                    |   |      |
|-----------------------------------|--------------------|---|------|
| <i>Escherichia coli</i> ATCC25922 | $7.48 \times 10^3$ | — | [17] |
| <i>S.aureus</i> ATCC29213         | $3.3 \times 10^3$  | — | [17] |
| <i>Salmonella typhimurium</i>     | 56                 | — | [18] |
| <i>Staphylococcus aureus</i>      | 120                | — | [19] |

## References

- [1] Ahmed A., Rushworth J.V., Hirst N.A., Millner P.A. Biosensors for Whole-Cell Bacterial Detection. *Clin. Microbiol. Rev.* **2014**, 27, 631–646.
- [2] Chen F., Chen D.A., Deng T., Li J.S. Combination of Alkaline Phosphatase/Graphene Oxide Nanoconjugates and D-Glucose-6-Phosphate-Functionalized Gold Nanoparticles for the Rapid Colorimetric Assay of Pathogenic Bacteria. *Biosens. Bioelectron.* **2022**, 216, 114611.
- [3] Roh S.G., Robby A.I., Phuong P.T.M., In I., Park S.Y. Photoluminescence-Tunable Fluorescent Carbon Dots-Deposited Silver Nanoparticle for Detection and Killing of Bacteria. *Mater. Sci. Eng. C.* **2019**, 97, 613-623.
- [4] Zhang X., Ren C.H., Hu F., Gao Y., Wang Z.Y., Li H.Q., Liu J.F., Liu B., Yang C.H. Detection of Bacterial Alkaline Phosphatase Activity by Enzymatic in Situ Self-Assembly of the Aiegen-Peptide Conjugate. *Anal. Chem.* **2020**, 92, 5185-5190.
- [5] Wang L., Wu X., Hu H., Huang Y., Yang X., Wang Q., Chen X. Improving the Detection Limit of Salmonella Colorimetry Using Long Ssdna of Asymmetric-Pcr and Non-Functionalized Aunps. *Anal. Biochem.* **2021**, 626, 114229.
- [6] Yang H., Xiao M., Lai W., Wan Y., Li L., Pei H. Stochastic DNA Dual-Walkers for Ultrafast Colorimetric Bacteria Detection. *Anal. Chem.* **2020**, 92, 4990-4995.
- [7] Le T.N., Tran T.D., Kim M.I. A Convenient Colorimetric Bacteria Detection Method Utilizing Chitosan-Coated Magnetic Nanoparticles. *Nanomaterials.* 2020, 10(1), 92.
- [8] Kang E.B., Mazrad Z.a.I., Robby A.I., In I., Park S.Y. Alkaline Phosphatase-Responsive Fluorescent Polymer Probe Coated Surface for Colorimetric Bacteria Detection. *Eur. Polym. J.* **2018**, 105, 217-225.
- [9] Wang K.-Y., Bu S.-J., Ju C.-J., Li C.-T., Li Z.-Y., Han Y., Ma C.-Y., Wang C.-Y., Hao Z., Liu W.-S., Wan J.-Y. Hemin-Incorporated Nanoflowers as Enzyme Mimics for Colorimetric Detection of Foodborne Pathogenic Bacteria. *Bioorganic Med. Chem. Lett.* **2018**, 28, 3802-3807.
- [10] Wang J., Cao Y., Li Z., Dong M., Dou W., Xu X., He S. Bridge-DNA Synthesis Triggered by an Allosteric Aptamer for the Colorimetric Detection of Pathogenic Bacteria. *Anal. Methods.* **2023**, 15, 275-283.
- [11] Huang J., Sun J., Warden A.R., Ding X. Colorimetric and Photographic Detection of Bacteria in Drinking Water by Using 4-Mercaptophenylboronic Acid Functionalized Aunps. *Food Control.* **2020**, 108, 106885.
- [12] Liu Y., Zhao C., Zhao W., Zhang H., Yao S., Shi Y., Li J., Wang J. Multi-Functional MnO<sub>2</sub>-Doped Fe<sub>3</sub>O<sub>4</sub> Nanoparticles as an Artificial Enzyme for the Colorimetric Detection of Bacteria. *Anal. Bioanal. Chem.* **2020**, 412, 3135-3140.



- [13] Wang C., Gao X., Wang S., Liu Y. A Smartphone-Integrated Paper Sensing System for Fluorescent and Colorimetric Dual-Channel Detection of Foodborne Pathogenic Bacteria. *Anal. Bioanal. Chem.* **2020**, 412, 611-620.
- [14] Chen Q.M., Gao R., Jia L. Enhancement of the Peroxidase-Like Activity of Aptamers Modified Gold Nanoclusters by Bacteria for Colorimetric Detection of Salmonella Typhimurium. *Talanta*. **2021**, 221. 121476.
- [15] Bahadoran A., Jabarabadi M.K., Mahmood Z.H., Bokov D., Janani B.J., Fakhri A. Quick and Sensitive Colorimetric Detection of Amino Acid with Functionalized-Silver/Copper Nanoparticles in the Presence of Cross Linker, and Bacteria Detection by Using DNA-Template Nanoparticles as Peroxidase Activity. *Spectrochim Acta A*.**2022**, 268. 120636.
- [16] Bagheri Pebdeni A., Hosseini M. Fast and Selective Whole Cell Detection of Staphylococcus Aureus Bacteria in Food Samples by Paper Based Colorimetric Nanobiosensor Using Peroxidase-Like Catalytic Activity of DNA-Au/Pt Bimetallic Nanoclusters. *Microchemical Journal*. **2020**, 159, 105475.
- [17] Sun J., Huang J., Li Y., Lv J., Ding X. A Simple and Rapid Colorimetric Bacteria Detection Method Based on Bacterial Inhibition of Glucose Oxidase-Catalyzed Reaction. *Talanta*. **2019**, 197, 304-309.
- [18] Ma X., Song L., Zhou N., Xia Y., Wang Z. A Novel Aptasensor for the Colorimetric Detection of S. Typhimurium Based on Gold Nanoparticles. *Int. J. Food Microbiol.* **2017**, 245, 1-5.
- [19] Verdoodt N., Basso C.R., Rossi B.F., Pedrosa V.A. Development of a Rapid and Sensitive Immunosensor for the Detection of Bacteria. *Food Chem.* **2017**, 221, 1792-1796.
